# Supplementary material for: Diverse resistive switching behaviors of AlN thin films with different orientations
Source: Royal Society of Chemistry journal article supplement (doi:10.1039/c8ce00966j), 2018-01-01
Supplement: c8ce00966j1.pdf [file c8ce00966j1.pdf]

# Diverse resistive switching behaviors of AlN thin films with different orientations

Chun-Cheng Lin,<sup>\*a</sup> Huei-Yu Liou,<sup>b</sup> Sheng-Yuan Chu,<sup>\*b, c</sup> Chih-Yu Huang,<sup>d</sup> and Cheng-Shong Hong<sup>d</sup>

<sup>a</sup>*Department of Mathematic and Physical Sciences, R.O.C. Air Force Academy, Kaohsiung 820, Taiwan, Republic of China*

<sup>b</sup>*Department of Electrical Engineering, National Cheng Kung University, Tainan 701, Taiwan, Republic of China*

<sup>c</sup>*Center for Micro/Nano Science and Technology, National Cheng Kung University, Tainan 701, Taiwan, Republic of China*

<sup>d</sup>*Department of Electronic Engineering, National Kaohsiung Normal University, Kaohsiung 802, Taiwan, Republic of China*

\*Corresponding authors' e-mail: [cclincafa@gmail.com](mailto:cclincafa@gmail.com), [chusy@mail.ncku.edu.tw](mailto:chusy@mail.ncku.edu.tw)

As shown in the Figure S1, the endurance of the amorphous-AlN structure reaches 100 cycles and the retention time reaches 1000000 s ( $\sim 11.6$  days). The results indicate the amorphous sample has a remarkable stability and performance.

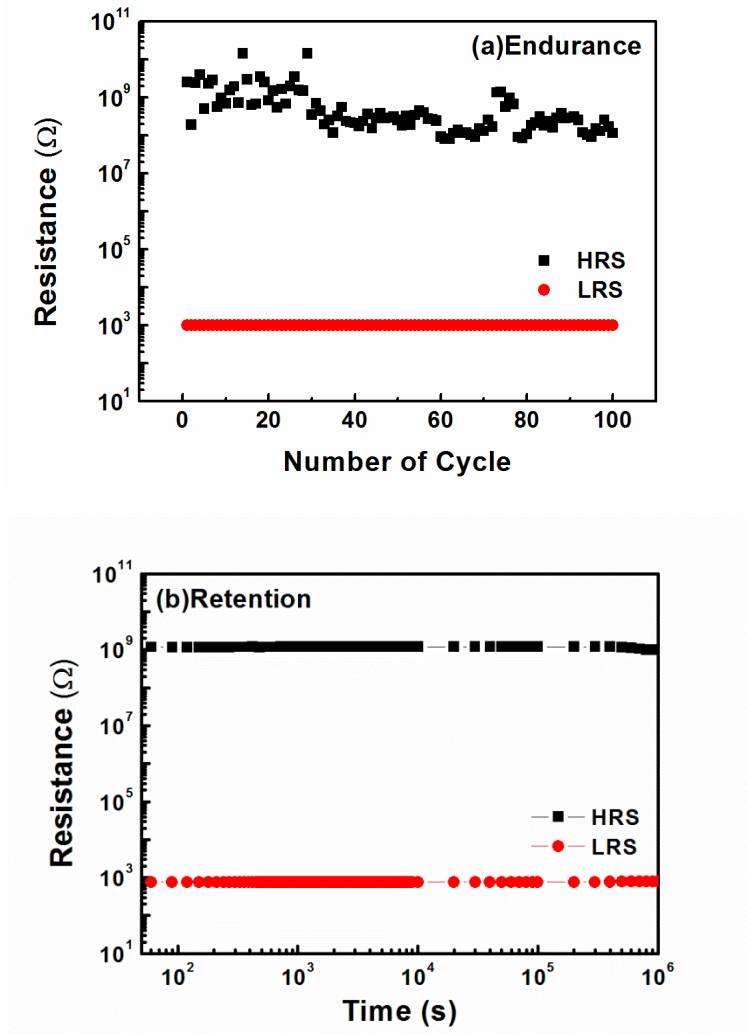

Figure S1. (a) Endurance and (b) retention tests of amorphous sample. Note that all the data were measured @ 0.1 V.
